# Supplementary material for: Increased spread and replication efficiency of Listeria monocytogenes in organotypic brain-slices is related to multilocus variable number of tandem repeat analysis (MLVA) complex
Source: PubMed Central journal article supplement (PMC4490720; doi:10.1186/s12866-015-0454-0), 2015-07-03
Supplement: 12866_2015_454_MOESM1_ESM.pdf [file 12866_2015_454_MOESM1_ESM.pdf]

| Strain designation   | strain information                 |              |         |      | PCR serovar | MLVA complex            | MLVA locus copy number |      |       |       |      |       |       |       |
|----------------------|------------------------------------|--------------|---------|------|-------------|-------------------------|------------------------|------|-------|-------|------|-------|-------|-------|
|                      | source                             | host species | Country | Year |             |                         | Lm-2                   | Lm-8 | Lm-10 | Lm-11 | Lm-3 | Lm-23 | Lm-15 | Lm-32 |
| L108/2007            | brain (rhombencephalitis)          | bovine       | CH      | 2007 | 4b; 4d; 4e  | A                       | 16                     | 3    | 2     | 4     | 1    | 16    | 2     | 18    |
| L120/2007            | brain (rhombencephalitis)          | bovine       | CH      | 2007 | 4b; 4d; 4e  | A                       | 16                     | 3    | 2     | 4     | 1    | 17    | 2     | 18    |
| L104/2007            | brain (rhombencephalitis)          | bovine       | CH      | 2007 | 4b; 4d; 4e  | A                       | 16                     | 3    | 2     | 4     | 2    | 17    | 2     | 18    |
| L146/2007            | brain (rhombencephalitis)          | bovine       | CH      | 2007 | 4b; 4d; 4e  | A                       | 17                     | 3    | 2     | 4     | 1    | 17    | 2     | 18    |
| L103/2007            | brain (rhombencephalitis)          | bovine       | CH      | 2007 | 4b; 4d; 4e  | A                       | 17                     | 3    | 2     | 4     | 1    | 22    | 2     | 18    |
| L142/2007            | brain (rhombencephalitis)          | bovine       | CH      | 2007 | 4b; 4d; 4e  | A                       | 17                     | 3    | 2     | 4     | 2    | 17    | 2     | 18    |
| L57/2007             | brain (rhombencephalitis)          | sheep        | CH      | 2007 | 4b; 4d; 4e  | A                       | 16                     | 3    | 2     | 4     | 1    | 17    | 1     | 18    |
| L28/2007             | brain (rhombencephalitis)          | sheep        | CH      | 2007 | 4b; 4d; 4e  | A                       | 17                     | 3    | 2     | 4     | 1    | 17    | 2     | 18    |
| L82/2007             | brain (rhombencephalitis)          | sheep        | CH      | 2007 | 4b; 4d; 4e  | A                       | 17                     | 3    | 2     | 4     | 2    | 16    | 2     | 18    |
| L85/2007             | brain (rhombencephalitis)          | sheep        | CH      | 2007 | 4b; 4d; 4e  | A                       | 17                     | 3    | 2     | 4     | 2    | 17    | 2     | 18    |
| L66/2007             | brain (rhombencephalitis)          | sheep        | CH      | 2007 | 4b; 4d; 4e  | A                       | 17                     | 3    | 2     | 5     | 2    | 17    | 2     | 18    |
| L34/2007             | brain (rhombencephalitis)          | sheep        | CH      | 2007 | 4b; 4d; 4e  | A                       | 22                     | 3    | 2     | 4     | 2    | 17    | 2     | 18    |
| L138/2007            | brain (rhombencephalitis)          | bovine       | CH      | 2007 | 1/2a; 3a    | C                       | 18                     | 2    | 2     | 4     | 7    | 20    | 1     | 14    |
| L127/2007            | brain (rhombencephalitis)          | goat         | CH      | 2007 | 1/2a; 3a    | C                       | 16                     | 2    | 2     | 3     | 4    | 20    | 3     | 14    |
| L95/2007             | brain (rhombencephalitis)          | goat         | CH      | 2007 | 1/2a; 3a    | C                       | 17                     | 2    | 2     | 4     | 10   | 14    | 1     | 13    |
| L51/2007             | brain (rhombencephalitis)          | sheep        | CH      | 2007 | 1/2a; 3a    | C                       | 16                     | 2    | 2     | 3     | 1    | 21    | 1     | 13    |
| L38/2007             | brain (rhombencephalitis)          | sheep        | CH      | 2007 | 1/2b; 3b; 7 | C                       | 16                     | 2    | 2     | 3     | 4    | 18    | 3     | 14    |
| L44/2007             | brain (rhombencephalitis)          | sheep        | CH      | 2007 | 1/2a; 3a    | C                       | 18                     | 2    | 2     | 3     | 1    | 18    | 1     | 14    |
| L97/2007             | brain (rhombencephalitis)          | sheep        | CH      | 2007 | 1/2a; 3a    | C                       | 18                     | 2    | 2     | 3     | 6    | 22    | 1     | 13    |
| O/D115/04            | brain (rhombencephalitis)          | sheep        | CH      | 2004 | nd          | C                       | 19                     | 2    | 2     | 3     | 10   | 20    | 2     | 14    |
| L5/2007              | brain (rhombencephalitis)          | sheep        | CH      | 2007 | 1/2a; 3a    | C                       | 19                     | 2    | 2     | 4     | 9    | 20    | 2     | 14    |
| CHUV 212/2005 (4b)   | CSF                                | human        | CH      | 2005 | 4b; 4d; 4e  | A                       | 17                     | 3    | 2     | 4     | 2    | 17    | 3     | 19    |
| CHUV 037/2006 (4b)   | CSF                                | human        | CH      | 2006 | nd          | A                       | 17                     | 4    | 2     | 4     | 1    | 17    | 2     | 18    |
| CHUV 016/2007 (4b)   | CSF                                | human        | CH      | 2007 | nd          | B                       | 16                     | 2    | 4     | 3     | 2    | 14    | 4     | 17    |
| CHUV 162/2006 (4b)   | CSF                                | human        | CH      | 2006 | 4b; 4d; 4e  | B                       | 16                     | 2    | 4     | 3     | 2    | 14    | 4     | 17    |
| CHUV 186/2006 (4b)   | CSF                                | human        | CH      | 2006 | 4b; 4d; 4e  | B                       | 16                     | 2    | 4     | 3     | 3    | 14    | 4     | 17    |
| JF5052               | udder (mastitis)                   | bovine       | CH      | 2010 | nd          | C *                     | 15                     | 2    | 3     | 0     | 10   | 40    | 1     | 13    |
| JF4971               | placenta (abortion)                | bovine       | GB      | 2004 | nd          | C *                     | 16                     | 2    | 5     | 4     | 6    | 22    | 2     | 13    |
| O/D36/08             | placenta (abortion)                | bovine       | CH      | 2008 | 4b; 4d; 4e  | C                       | 17                     | 3    | 2     | 4     | 2    | 17    | 3     | 18    |
| O/D1387/06           | placenta (abortion)                | bovine       | CH      | 2006 | 1/2a; 3a    | C                       | 19                     | 2    | 2     | 3     | 1    | 14    | 2     | 14    |
| A156                 | placenta (abortion)                | bovine       | CH      | 2010 | nd          | C                       | 19                     | 2    | 2     | 3     | 8    | 21    | 2     | 14    |
| O/D1171/06           | placenta (abortion)                | bovine       | CH      | 2006 | 1/2a; 3a    | C                       | 21                     | 2    | 2     | 3     | 2    | 10    | 6     | 15    |
| JF4978               | abomasal content (gastroenteritis) | sheep        | GB      | 2004 | nd          | SLV associated with A * | 15                     | 3    | 5     | 5     | 5    | 17    | 3     | 16    |
| CHUV 144/2006 (4b)   | neonatal infection                 | human        | CH      | 2006 | 4b; 4d; 4e  | A                       | 5                      | 3    | 2     | 4     | 1    | 17    | 2     | 18    |
| CHUV 253/2005 (4b)   | neonatal infection                 | human        | CH      | 2005 | 4b; 4d; 4e  | A                       | 17                     | 3    | 2     | 5     | 2    | 17    | 2     | 18    |
| CHUV 091/2005 (1/2a) | neonatal infection                 | human        | CH      | 2005 | nd          | C                       | 18                     | 2    | 2     | 3     | 7    | 19    | 1     | 14    |
| CHUV 092/2005 (1/2a) | neonatal infection                 | human        | CH      | 2005 | nd          | C                       | 19                     | 2    | 2     | 3     | 7    | 19    | 1     | 14    |
| CHUV55/2007 (1/2a)   | food                               | n/a          | CH      | 2007 | nd          | C                       | 21                     | 2    | 2     | 3     | 2    | 11    | 1     | 14    |
| CHUV181/2006 (1/2a)  | food                               | n/a          | CH      | 2006 | 1/2c; 3c    | C                       | 22                     | 2    | 2     | 3     | 7    | 11    | 1     | 14    |
| CHUV 188/2005 (1/2a) | environment                        | n/a          | CH      | 2005 | nd          | C                       | 15                     | 2    | 2     | 3     | 8    | 19    | 2     | 14    |
| CHUV 031/2005 (1/2a) | environment                        | n/a          | CH      | 2005 | nd          | C                       | 17                     | 2    | 2     | 3     | 1    | 20    | 3     | 14    |
| CHUV 153/2005 (1/2a) | environment                        | n/a          | CH      | 2005 | 1/2a; 3a    | C                       | 18                     | 2    | 2     | 4     | 6    | 22    | 1     | 13    |
| CHUV 003/2005 (1/2a) | environment                        | n/a          | CH      | 2005 | nd          | C                       | 19                     | 2    | 2     | 3     | 5    | 23    | 1     | 14    |
| GL18                 | cheese                             | n/a          | GR      | 2006 | 1/2c; 3c    | C                       | 18                     | 2    | 2     | 3     | 1    | 3     | 1     | 13    |
| GL16                 | cheese                             | n/a          | GR      | 2006 | 1/2c; 3c    | C                       | 18                     | 2    | 2     | 3     | 5    | 7     | 1     | 13    |
| GL19                 | cheese                             | n/a          | GR      | 2006 | 1/2a; 3a    | C                       | 19                     | 2    | 2     | 2     | 5    | 8     | 1     | 14    |
| GL17                 | cheese                             | n/a          | GR      | 2006 | 1/2c; 3c    | C                       | 21                     | 2    | 2     | 3     | 6    | 1     | 1     | 13    |
